# Supplementary material
Source: PubMed Central journal article supplement (PMC3464641)
Supplement: mt2012154x1.pdf [file mt2012154x1.pdf]

## **SUPPLEMENTAL TABLES**

**Table S1**

**Confirmatory q-PCR for several key genes from microarray results**

| <b>Gene</b>                                              | <b>Symbol</b> | <b>Wt CEHPOBA-treated<br/>vs. <i>Fah</i><sup>-/-</sup> on NTBC</b> | <b><i>Fah</i><sup>-/-</sup> off NTBC<br/>vs. <i>Fah</i><sup>-/-</sup> on NTBC</b> |
|----------------------------------------------------------|---------------|--------------------------------------------------------------------|-----------------------------------------------------------------------------------|
| Tyrosine aminotransferase                                | <i>Tat</i>    | -26.18                                                             | -17.40                                                                            |
| Cytochrome P450, family 2,<br>subfamily e, polypeptide 1 | <i>Cyp2e1</i> | -8.12                                                              | -6.55                                                                             |
| Apolipoprotein A2                                        | <i>Apoa2</i>  | -2.34                                                              | -6.10                                                                             |
| Alpha-fetoprotein                                        | <i>Afp</i>    | 1042.3                                                             | 1001.2                                                                            |
| Cyclin-dependent kinase inhibitor 1A                     | <i>Cdkn1a</i> | 250.7                                                              | 200.1                                                                             |
| Regulator of calcineurin 1                               | <i>Rcan1</i>  | 102.3                                                              | 76.8                                                                              |

*Footnotes: Genes that are similarly regulated in wild-type mice treated with CEHPOBA and *Fah*<sup>-/-</sup> mice off NTBC compared to *Fah*<sup>-/-</sup> on NTBC. Values represent fold change.*
