# Supplementary material
Source: PubMed Central journal article supplement (PMC3464641)
Supplement: mt2012154x2.pdf [file mt2012154x2.pdf]

**Table S2****Y-chromosome qPCR and FISH results in immune-deficient recipients**

| <b>Mouse</b> | <b>CEHPOBA</b> | <b>Duration (wk)</b> | <b>% Repopulation by Y-chr qPCR</b> | <b>% Repopulation by Y-chr FISH</b> |
|--------------|----------------|----------------------|-------------------------------------|-------------------------------------|
| NSG          | +              | 3                    | 1.00                                | 2.5                                 |
| NSG          | +              | 3                    | 0.15                                | 2.5                                 |
| NSG          | +              | 3                    | 0.12                                | 1.25                                |
| NSG          | -              | 3                    | 0.09                                | 0                                   |
| NSG          | -              | 3                    | 0.08                                | 0                                   |

*Footnotes: The percentage of Y-chromosome donor marker was quantified by qPCR or FISH from NSG mice transplanted with Hgd<sup>-/-</sup> hepatocytes, with or without a 3-wk course of CEHPOBA.*
